# Supplementary material for: Clinical and Dietary Determinants of Muscle Mass in Patients with Type 2 Diabetes: Data from the Diabetes and Lifestyle Cohort Twente
Source: MDPI journal article supplement (doi:10.3390/jcm10225227), 2021-11-10
Supplement: s1 [file s1]

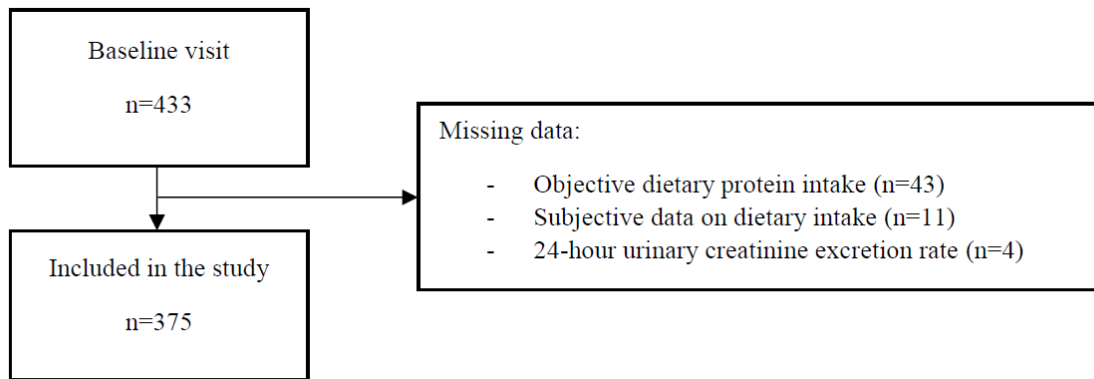

**Figure S1.** Patient inclusion flowchart.

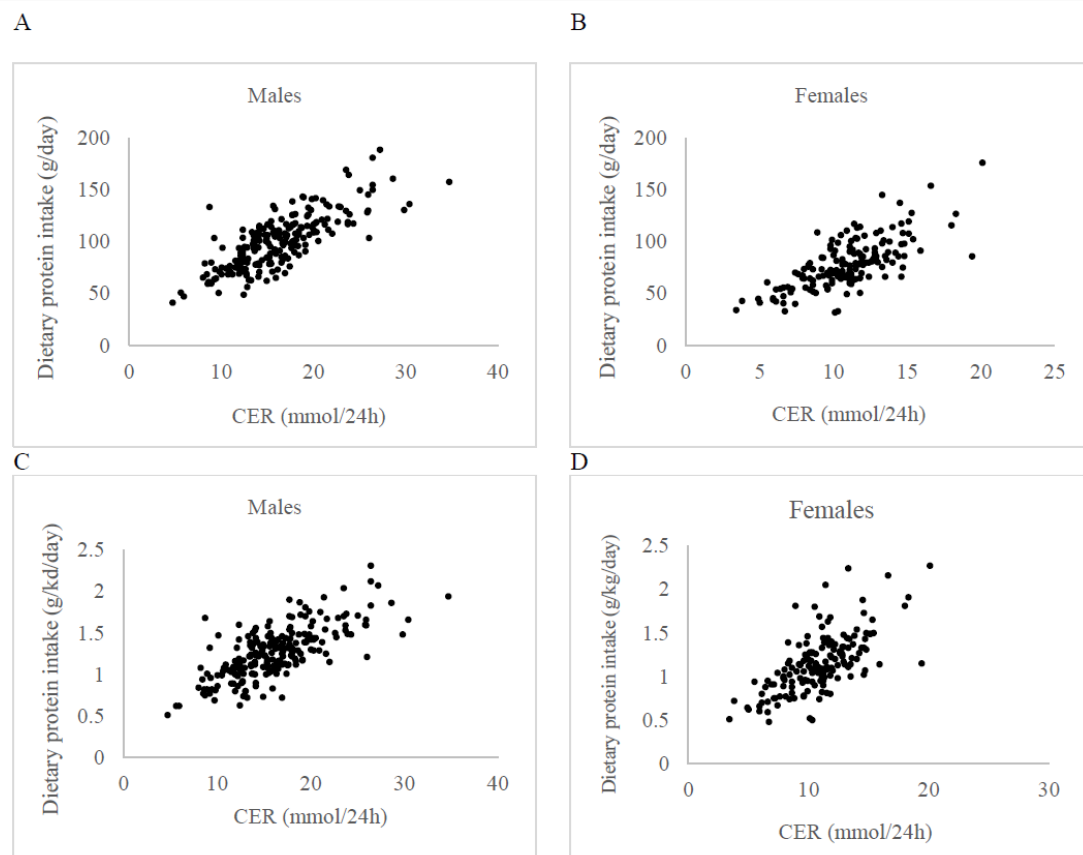

**Figure S2.** Scatterplots with urinary creatinine excretion on the x-axis and dietary protein intake in gram/day and gram/kg/day on the y-axis, stratified by sex. (A) is dietary protein intake in g/day for males, (B) is dietary protein intake in g/day for females, (C) is dietary protein intake in g/kg/day for males and (D) is dietary protein intake in g/kg/day for females.
